# Supplementary material for: New Mitochondrial Gene Rearrangement in Psyttalia concolor, P. humilis and P. lounsburyi (Hymenoptera: Braconidae), Three Parasitoid Species of Economic Interest
Source: PubMed Central journal article supplement (PMC7761351; doi:10.3390/insects11120854), 2020-12-02
Supplement: insects-11-00854-s001.pdf [file insects-11-00854-s001.pdf]

**Table S1.** Primers and cycling protocols used for polymerase chain reaction (PCR) amplification and Sanger sequencing (Seq) of the complete mitochondrial genome of *Psytalia concolor*. All segments were amplified and sequenced with primers designed specifically for this study, except S03\* (universal DNA barcoding primers).

| Segment | Cycling protocol | Primer   | Primer sequence (5' - 3')          | Use-direction |
|---------|------------------|----------|------------------------------------|---------------|
| S01     | PAS2             | TC16-023 | TAG AAG TTT TAT TAG TGA TAA GTC    | PCR-F, Seq-F  |
|         |                  | TC14-172 | TGT CTG ATT TAA GTA ATA AAC TG     | PCR-R         |
| S01     | PAS2             | TC15-107 | ATA AAA TTA GGA ATA TTT CCC TTT C  | PCR-F, Seq-F  |
|         |                  | TC14-172 | TGT CTG ATT TAA GTA ATA AAC TG     | PCR-R         |
| S02     | PAS1             | TC14-160 | ATA TCA TTA GGT GGT TTA CCT CC     | PCR-F, Seq-F  |
|         |                  | TC11-107 | GGT ATC CCT AAC TCT AAC CG         | PCR-R, Seq-R  |
| S03*    | PAS1             | LCO1490  | GGT CAA CAA ATC ATA AAG ATA TTG G  | PCR-F, Seq-F  |
|         |                  | HC02198  | TAA ACT TCA GGG TGA CCA AAA AAT CA | PCR-R, Seq-R  |
| S04     | PAS1             | TC11-104 | GGG ACC CTG TTT TAT ATC AAC        | PCR-F, Seq-F  |
|         |                  | TC14-016 | CGA TTA TCA ACA TCT AAT AAA CG     | PCR-R, Seq-R  |
|         |                  | TC14-171 | CTG CTA TAA TAG CAA ATA CAG C      | Seq-R         |
| S05     | PAS1             | TC14-108 | AGG GCA TCA ATG ATA CTG AAG        | PCR-F, Seq-F  |
|         |                  | TC14-107 | AAT GTA ATT AAT AAA TGA CCA GC     | PCR-R, Seq-R  |
| S06     | PAS2             | TC15-039 | TAT ATT AGC TCA TTT AGT TCC TC     | PCR-F         |
|         |                  | TC16-018 | AAC AAA ATG TCA ATA TCA TGA GG     | PCR-R, Seq-R  |
| S06*    | PAS1             | TC15-039 | TAT ATT AGC TCA TTT AGT TCC TC     | PCR-F, Seq-F  |
|         |                  | TC15-074 | AAA AAA CAG ACC CAT AAA TTG AAT C  | PCR-R, Seq-R  |
| S07     | PAS2             | TC15-098 | GAG TAT TCT GAA TCA TAT TTT TC     | PCR-F, Seq-F  |
|         |                  | TC15-082 | GTT TAA TAA TGA AAA TAT TAA GAT G  | PCR-R, Seq-R  |
| S08     | PAS2             | TC15-110 | AAT TCC AAT TAA AAT AAG TAT GAA C  | PCR-F, Seq-F  |
|         |                  | TC15-101 | TTA CAA AAA GAG CCC AAA TTC C      | PCR-R, Seq-R  |
| S09     | PAS1             | TC15-043 | AGT TAC TAA TGT TGA GGA ATG AAC    | PCR-F, Seq-F  |
|         |                  | TC15-044 | TGA TTA CCT AAA GCC CAT GTA GAA G  | PCR-R, Seq-R  |
| S10     | PAS3             | TC16-004 | GAT TAA ACT AGA AAT TAA GCT TCC    | PCR-F, Seq-F  |
|         |                  | TC15-083 | AAA TTA TTA ACC CAC CAA TAA TTA C  | PCR-R, Seq-R  |
| S10*    | PAS2             | TC15-076 | AAC GGT ATA ATC CAT AAG ACC C      | PCR-F, Seq-F  |
|         |                  | TC15-083 | AAA TTA TTA ACC CAC CAA TAA TTA C  | PCR-R, Seq-R  |
| S11     | PAS2             | TC15-084 | CTG GCT TGA ATT CGA TCA ATT TG     | PCR-F         |
|         |                  | TC15-077 | TAT GAA TTA AAC GTA TTA ATC ACC C  | PCR-R         |
|         |                  | TC16-015 | ATAGATACAGGAATTGTTTTTAAC           | Seq-F         |
| S12     | PAS3             | TC15-102 | TTT AGT TAA TTT ACC TAC TCC TG     | PCR-F, Seq-F  |
|         |                  | TC15-103 | CTG CTT GAG ACC CTA ATC AAG        | PCR-R, Seq-R  |
| S13     | PAS1             | TC15-045 | CTC CTG TTC ATA TTC AAC CAG AAT G  | PCR-F, Seq-F  |
|         |                  | TC15-046 | TGC TCA ATC TAT TTC TTA TGA AG     | PCR-R         |
| S14     | PAS2             | TC14-162 | ATT CAG ATT CTC CTT CTG ATA AAT C  | PCR-F, Seq-F  |
|         |                  | TC14-164 | ATA AAT TAC CTT AGG GAT AAC AGC    | PCR-R, Seq-R  |
| S15     | PAS2             | TC15-085 | GGC TTA CGC CGA TCT TAA CTC        | PCR-F, Seq-F  |
|         |                  | TC15-086 | TTA ATA TAG GTA CAT ATC GCC CGT C  | PCR-R, Seq-R  |
| S16     | PAS2             | TC15-104 | TTA GAA TTA TTC TGA TAC AAA AGG    | PCR-F, Seq-F  |
|         |                  | TC15-105 | ATG AAG TGC CTG AAT AAA AGG        | PCR-R, Seq-R  |
| S17     | PAS2             | TC15-088 | AAT AAT AGG GTA TCT AAT CCT AGT    | PCR-F         |

|     |      |          |                                   |              |
|-----|------|----------|-----------------------------------|--------------|
|     |      | TC16-022 | ATT TTA TCC CTA ATT TAA CTG CC    | PCR-R, Seq-R |
| S17 | PAS2 | TC15-088 | AAT AAT AGG GTA TCT AAT CCT AGT   | PCR-F, Seq-F |
|     |      | TC15-089 | ATT TAA GCT TTT TGG TTC ATA CCC   | PCR-R        |
| S18 | PAS2 | TC15-106 | AAT CCT TTT ATT CAG GCA CTT C     | PCR-F, Seq-F |
|     |      | TC15-109 | CTC AAT TTA ACT CAA CTA ATA TAT C | PCR-R, Seq-R |

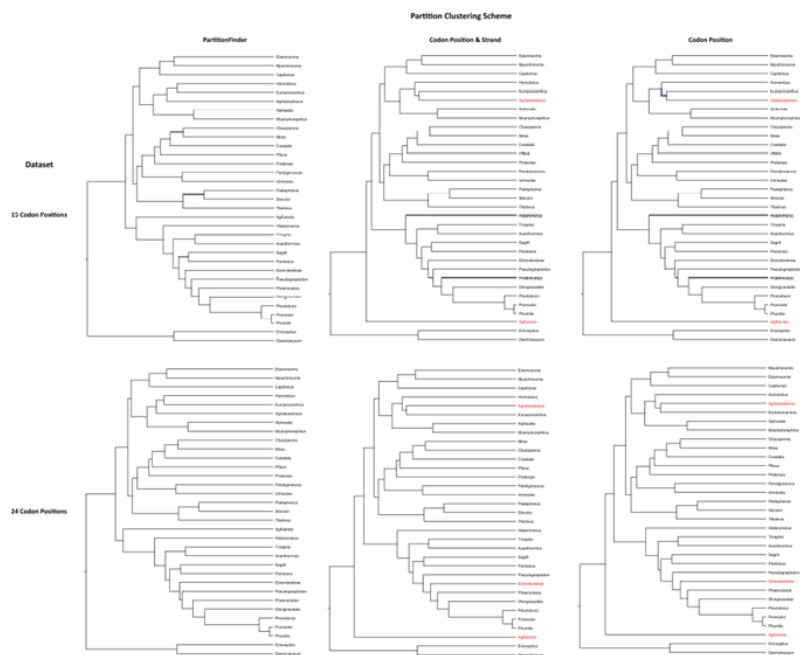

**Figure S1.** Bayesian phylogenetic reconstruction among Braconidae obtained with different datasets and partition clustering schemes. A to C: 15 codon positions dataset; D to F: 24 codon positions dataset; A and D: clustering with Partition Finder; B and E: clustering by codon position and strand location; C & F: clustering by codon position alone. Species with altered positions relative to the tree obtained with the main analysis (A) are indicated in red.
